# Supplementary material
Source: Springer Nature journal article supplement (https://www.springermedizin.de/resource/supplementary/12985_2010_1066_MOESM3_ESM.pdf/9609074)

% Negative for antigenemia

$p = < 0.001$

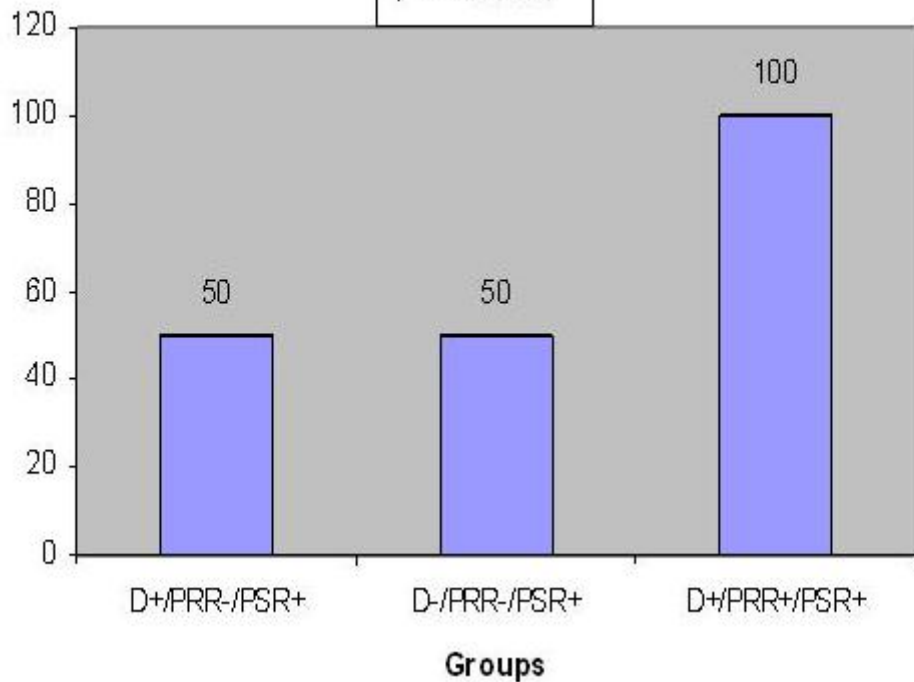

Supplement: MOESM3 [file 9609074]
